# Efficient Calculation of the Genomic Relationship Matrix

Martin Schlather  
Institut für Mathematik, Universität Mannheim  
B6, 26, D-68159 Mannheim  
schlather@math.uni-mannheim.de

January 12, 2020

Since the calculation of a genomic relationship matrix needs a large number of arithmetic operations, fast implementations are of interest. Our fastest algorithm is more accurate and  $25\times$  faster than a AVX double precision floating-point implementation.

**Keywords:** crossproduct; covariance matrix; genetic relationship; genomic relatedness matrix; hash table

## 1 Background

The genomic relationship matrix (GRM) is the covariance matrix calculated from the SNP information of the individuals, i.e., from the minor allele counts [1]. It is an important ingredient in mixed models and generalized mixed models for analyses and predictions in genetics [2].

Let  $n$  be the number of individuals and  $s$  the number of SNPs per individual. Then, the calculation of the GRM needs of order  $sn^2$  arithmetic operations. Most software packages use floating-point arithmetics, for instance the R packages `AGHmatrix` [3], `qgg` [4], `rrBLUP` [5], `snpReady` [6], and `GENESIS` [7]. The software `GCTA` [8] treats missings explicitly. The package `SNPRelate` [9] also uses floating-point arithmetics for the covariance matrix, but uses bit manipulation algorithms for other calculations (identity-by-descent estimates). `PLINK` [10] profits from bit manipulations for calculating the uncentred covariance matrix.

In this paper we present a couple of ideas, how the GRM can be calculated efficiently from a SNP matrix. We assume that no values are missing. The emphasis will be on algorithms that allow for a vectorized implementation (SIMD) and that take into account that the entries of the SNP matrix are most efficiently coded by 2 bits, namely for the values 0, 1 and 2, as they are present in diploid organism under the common assumption of biallelic markers.

## 2 Results

The standard mathematical formula for the GRM requires floating point arithmetics. An algebraic reformulation shows that the cost intensive part involves only integers. Since the most elementary numbers need only a minimum of 2 bits, a diversity of approaches for the integer arithmetics is thinkable. The investigated methods are in brief:

- `Multiply` : uses 16-bit arithmetics
- `Hamming2` : uses pop counts (the number of bits that are 1)
- `ThreeBit` : uses a 3-bit representation and a single large hash table
- `TwoBit` : uses the 2-bit representation and two large hash tables

- **Shuffle** : similar to **TwoBit**, but with two tiny hash tables
- **Packed** : uses 4-bit arithmetics

They are all available through **crossprodx** in the package **miraculix** [11]. Tables 1 and 2 show that **Shuffle** is the fastest method, which is 35× faster than **crossprod** of R [12] in the SSSE3 implementation.

Table 1: Acceleration of the calculation of  $M^T M$  by **crossprodx**.

|              | <b>Shuffle</b> | <b>Packed</b> | <b>Hamming2</b> | <b>Multiply</b> | <b>ThreeBit</b> | <b>TwoBit</b> |
|--------------|----------------|---------------|-----------------|-----------------|-----------------|---------------|
| acceleration | 35×            | 28×           | 24×             | 17×             | 17×             | 15×           |
| SIMD         | SSSE3          | SSE2          | SSE2            | SSE2            | SSE2            | none          |

The reference point is **crossprod** in R.

Table 2: Acceleration of the calculation of  $M^T M$  by AVX2 implementations in **crossprodx**.

|              | <b>Shuffle</b> | <b>Packed</b> | <b>Multiply</b> | AVX (double) | AVX2 (32-bit integer) |
|--------------|----------------|---------------|-----------------|--------------|-----------------------|
| acceleration | 48 ×           | 36×           | 29×             | 1.8×         | 4×                    |

The reference point is **crossprod** in R.

The command **relationshipMatrix** in **miraculix** [11] for calculating the GRM is only negligibly slower than **crossprodx**. The AVX2 variant of **Shuffle** is even 48× faster than **crossprod** [12] and  $48/1.8 \approx 25\times$  faster than a standard AVX double precision implementation for calculating the crossproduct of an arbitrary matrix, cf. Table 2. Furthermore, our algorithms have not even any cumulative rounding error.

Tables 1 and 2 also show that the AVX2 performance is hard to predict from the SSE performance. AVX2 variants for **TwoBit** and **ThreeBit** are not given since full vectorization is not possible. **Hamming2** has not been pursued because of its memory demand.

For the benchmarks, we used an  $s \times n$  SNP matrix with  $n = 1000$  individuals and  $s = 5 \cdot 10^5$  SNPS. The calculations were performed on an Intel(R) Core(TM) i7-8550U CPU @ 1.80GHz with R version 3.6.0 on Xubuntu. Although the code in **miraculix** is parallelized, we used only a single core for the benchmarks. Nonetheless, the AVX2 variant of **Shuffle** takes not more than 7 seconds. The code for the benchmarks is available from the man page of **crossprodx** in **miraculix**.

### 3 Discussion

First, with respect to the memory needs of the SNP matrix, algorithms that use the 2-bit representation of a SNP value should be preferred. Among them, we have a sequence of distinct algorithms that differ in their speed-up and their SIMD requirements: **TwoBit** (15×; SIMD not used), **Packed** (28×; SSE2); **Shuffle** (35×; SSSE3).

Second, the use of perfect hash tables to cut calculations short might be of general importance.

Third, since loading from non-aligned memory allocation is reported to be slower [13], the package **miraculix** was designed to avoid non-aligned loadings. Tests on the implemented package however show that the running time by non-aligned loadings is not reduced for SSE implementations. The speed is reduced by 5 to 10 % in AVX2 implementations. As the compressed SNP matrix is made available to the user as an R object and as the memory allocation by R is only 32-bit aligned, additional memory is allocated and the SNP matrix is aligned to 128 or 256 bits. Furthermore, additional zeros are appended so that the virtual number of SNPs is a multiple of the number of the SNPs that can be treated in a single step. The storing formats of **TwoBit**, **Multiply**, **Packed**, and **Shuffle**, including their AVX2 variants, were made compatible, i.e., the allocations are all based on a 256-bit alignment. A check and a reallocation are implemented for the case that memory is moved. This might happen when the garbage collector **gc** is called by R, for instance.

## 4 Conclusion

The combination of algebraic reformulation, bit manipulations and hash tables can reduce largely the computing time on SNP data. In the case of calculating the GRM, the computing time could be reduced by factor 25 in comparison to a straightforward AVX double precision implementation. As a spectrum of implementations exist, there is a chance of further improvement and of further applications of the underlying ideas.

## 5 Methods

Let  $M$  be an  $s \times n$  SNP matrix of  $n$  individuals and  $s$  SNPs. We need to consider only the fast calculation of the crossproduct  $M^\top M$ , since the GRM  $A$  can be calculated from  $M^\top M$  at low costs. This can be seen as follows.

Let  $\mathbf{1}_k$  be the vector of length  $k$  whose components are all equal to 1. The centred and normalized GRM  $A$  is calculated as

$$A = (M - P)^\top (M - P) / \sigma^2$$

where

$$P = p\mathbf{1}_s^\top \quad \text{with} \quad p = \frac{1}{n}M\mathbf{1}_n.$$

and

$$\sigma^2 = \sum_{i=1}^s p_i(1 - p_i/2) \quad \text{with} \quad p = (p_1, \dots, p_s).$$

Note that replacing the value  $p_i$  by the allele frequency  $\tilde{p}_i = p_i/2$ , we have the usual formula for  $\sigma^2$ ,

$$\sigma^2 = 2 \sum_{i=1}^s \tilde{p}_i(1 - \tilde{p}_i).$$

Let  $B = M^\top M\mathbf{1}_n$ . Then

$$n^2\sigma^2 A = n^2 M^\top M - n\mathbf{1}_s B^\top - nB\mathbf{1}_s^\top + \mathbf{1}_s \mathbf{1}_n^\top B \mathbf{1}_s^\top.$$

Hence, the integer-valued matrix  $n^2\sigma^2 A$  can easily be calculated from the matrix  $M^\top M$  without any numerical error and at low computational costs of order  $n^2$ . Now,

$$2n^2\sigma^2 = 2n^2 \sum_{i=1}^s p_i - n^2 \sum_{i=1}^s p_i^2 = 2n\mathbf{1}_s^\top M\mathbf{1}_n - \mathbf{1}_n^\top B.$$

Again,  $2n^2\sigma^2$  can easily be calculated from  $M$  and  $M^\top M$  without any numerical error. The computational costs are of order  $n(n+p)$ , hence still some magnitudes smaller than the costs of calculating the crossproduct  $M^\top M$ .

### 5.1 Algorithms for scalar products

Instead of considering the crossproduct  $M^\top M$ , it suffices to consider the scalar product of two vectors  $a = (a_1, \dots, a_s)$  and  $b = (b_1, \dots, b_s)$  whose components  $a_i$  and  $b_i$  have the values 0, 1 or 2. For simplicity and clarity, we will primarily refer to SSE commands in the following, and not to AVX.

### 5.1.1 Simple Multiplication

An immediate way of calculating the scalar product from a compressed 2-bit representation is to extract the first two bits of each of the two vectors  $a$  and  $b$  and to continue with integer arithmetics. Then the next two bits are extracted using shifting, and so on. Clearly, this procedure can be vectorized. Of particular advantage here is the SSE2 command `_mm_madd_epi16`, which multiplies and adds two consecutive 16-bit integers so that only 7 shifts are necessary for a vector of 64 SNP values, i.e., for 128 bits. We call this method `Multiply`.

### 5.1.2 Hamming Distance

The algorithm used in PLINK [14, 10] is based on the idea that a value is represented by the number of bits that equal 1 in a 4-bit representation. The values of the vectors  $a$  and  $b$  must be coded asymmetrically by two mappings  $f_a$  and  $f_b$ , say, as a coding by single mapping is not possible. Then, the bitwise `&`-operator is applied before the number of 1's is counted. Table 3 gives a possible realisation.

Table 3: Table of values for the Hamming distance method.

| $f_a(\cdot) \& f_b(\cdot)$ | $f_b(0) = 0000_b$ | $f_b(1) = 0011_b$ | $f_b(2) = 1111_b$ |
|----------------------------|-------------------|-------------------|-------------------|
| $f_a(0) = 0000_b$          | 0000 <sub>b</sub> | 0000 <sub>b</sub> | 0000 <sub>b</sub> |
| $f_a(1) = 0110_b$          | 0000 <sub>b</sub> | 0010 <sub>b</sub> | 0110 <sub>b</sub> |
| $f_a(2) = 1111_b$          | 0000 <sub>b</sub> | 0011 <sub>b</sub> | 1111 <sub>b</sub> |

The number of bits that equal 1 can be calculated by SSE2 commands based on work by [15, 16]. We call the method `Hamming2`. (An SSSE3 implementation in `miraculix` [11] is called `Hamming3`.) The method can be turned into a particularly fast implementation when novel AVX512 commands are used for the pop counts, e.g. `_mm512_popcnt_epi64`. See also `SNPRelate` [9] for pop count implementations. Still, the storing costs of the SNP matrix  $M$  remain high, namely  $2 \times 4 = 8$  bits per SNP in a standard implementation.

### 5.1.3 Perfect Hash Table

Let us consider the product of the first elements  $a_1$  and  $b_1$  of the two SNP vectors  $a$  and  $b$ . Let us code the SNP values 0, 1 and 2 by 3 bits, e.g. as 000<sub>b</sub>, 011<sub>b</sub> and 110<sub>b</sub>, respectively, and denote this mapping by  $f$ . Then, a perfect hash table for  $f(a_1) \& f(b_1)$  returns 0, 1, 2, 4 for 000<sub>b</sub>, 011<sub>b</sub>, 010<sub>b</sub>, and 110<sub>b</sub>, respectively, cf. Table 4.

Table 4: Table of values for the `ThreeBit` method.

| $f(\cdot) \& f(\cdot)$ | $f(0) = 000_b$   | $f(1) = 011_b$   | $f(2) = 110_b$   |
|------------------------|------------------|------------------|------------------|
| $f(0) = 000_b$         | 000 <sub>b</sub> | 000 <sub>b</sub> | 000 <sub>b</sub> |
| $f(1) = 011_b$         | 000 <sub>b</sub> | 011 <sub>b</sub> | 010 <sub>b</sub> |
| $f(2) = 110_b$         | 000 <sub>b</sub> | 010 <sub>b</sub> | 110 <sub>b</sub> |

Subvectors of length  $k$  of  $a$  and  $b$  can be treated in the same way and the perfect hash table returns then the scalar product of the subvectors. The hash table will be indexed by  $3k$ -bit numbers, i.e. by values between 0 and  $2^{3k} - 1$ . Since  $k$  should be as large as possible at a smallish size of the hash table, and  $3k$  bits should fit nicely into 1, 2 or 4 bytes, the only reasonable choice for  $k$  is  $k = 5$ , so that 15 bits in a 16-bit representation of a vector with  $k = 5$  components are used. The precise size of the hash table is then  $110\ 110\ 110\ 110\ 110_b + 1 = 28087$  bytes. We call this method `ThreeBit`.

### 5.1.4 Two Perfect Hash Tables

Since we did not find a simple way to use a single hash table based on a 2-bit representation of the SNP values, we consider here two hash tables and the two bitwise operators  $\&$  and  $|$ . The first hash table should return 1 and 4 for  $01_b$  and  $10_b$ , respectively, while the second hash table returns 2 for  $11_b$ . All other values in the hash tables are 0, cf. Table 5.

Table 5: Tables of values for the **TwoBit** method.

| $\&$   | $00_b$ | $01_b$ | $10_b$ | $ $    | $00_b$ | $01_b$ | $10_b$ |
|--------|--------|--------|--------|--------|--------|--------|--------|
| $00_b$ | $00_b$ | $00_b$ | $00_b$ | $00_b$ | $00_b$ | $01_b$ | $10_b$ |
| $01_b$ | $00_b$ | $01_b$ | $00_b$ | $01_b$ | $01_b$ | $01_b$ | $11_b$ |
| $10_b$ | $00_b$ | $00_b$ | $10_b$ | $10_b$ | $10_b$ | $11_b$ | $10_b$ |

Then, the sum of the two table values yields the product  $a_1 b_1$ . Scalar products of subvectors of length  $k$  can also be treated by two hash tables. Since the size of both hash tables is of order  $2^{2k}$ , one possible choice is  $k = 8$ , so that the size of the second hash table is 65536 bytes. We call this method **TwoBit**.

The disadvantage of **TwoBit** (and **ThreeBit**) is that the look-up in the hash table prohibits a full vectorization. A much better choice is therefore  $k = 2$ : the SSSE3 command `_mm_shuffle_epi8` looks 16 values up at once in a hash table of size 16. We call this variant **Shuffle**.

### 5.1.5 Packed arithmetics

A last idea is to emulate a multiplication by bitwise operations and partial sums. Let  $\gg$  denote the bitwise shift operator and let

$$\begin{aligned}
 c_i &= a_i \& b_i, \\
 d_i &= (c_i \gg 1) \& 01_b, \\
 e_i &= (a_i \gg 1) \& b_i \& 01_b, \text{ and} \\
 f_i &= a_i \& (b_i \gg 1) \& 01_b,
 \end{aligned}$$

so that  $c_i + 2d_i = a_i b_i$  if  $a_i = b_i$  and 0 else. Furthermore  $2(e_i + f_i) = a_i b_i$  if  $a_i b_i = 2$  and 0 else. In total, we have  $c_i + 2d_i + 2(e_i + f_i) = a_i b_i$ . Let  $g_i = d_i + e_i + f_i$ . Since  $g_i = d_i | e_i | f_i$  for the bitwise operator  $|$ , only the values of  $g_i$  and  $c_i$  need to be summed up. An immediate extraction of the values of  $g = (g_1, \dots, g_s)$  and  $c = (c_1, \dots, c_s)$  by shifting as in the **Multiply** algorithm would be rather expensive. Instead, a 4-bit arithmetic can be introduced in an intermediate step for the four vectors

$$\begin{aligned}
 &\dots 00_b c_3 00_b c_1, \\
 &\dots 00_b c_4 00_b c_2, \\
 &\dots 00_b g_3 00_b g_1, \text{ and} \\
 &\dots 00_b g_4 00_b g_2,
 \end{aligned}$$

which can be obtained by two shifts and 4 bitwise  $\&$ -operations in total, if the ordering in the memory is  $\dots c_4 c_3 c_2 c_1$ . Since the value of  $c_i$  is at most 2, a sevenfold summation of the first two displayed vectors leaves each component within its 4 bits (using any unsigned integer SIMD addition). Since the value of  $g_i$  is either 0 or 1, even a fifteen-fold summation is possible for the last two displayed vectors. Afterwards, the 4-bit values are extracted and further summed up. We call this method **Packed**.

The novel AVX512 command `_mm512_popcnt_epi64` might improve this approach, as it allows to count the number of bits being 1 in  $c_i$ ,  $d_i$  and  $e_i | f_i$ , so that the number of products is counted

that equal (i)  $1^2$  or  $2^2$ , (ii)  $2^2$ , and (iii)  $1 \cdot 2$  or  $1 \cdot 2$ . This variant can be seen as a 2-bit analogue of the Hamming2 algorithm, and will be implemented in future.

## 6 Abbreviations

**AVX:** Advanced vector extensions  
**SIMD:** Single instruction, multiple data  
**SNP:** Single nucleotide polymorphism  
**SSE:** Streaming SIMD extensions  
**SSSE:** Supplemental streaming SIMD extensions  
**GRM:** Genomic relationship matrix

## 7 Acknowledgements

The author is grateful to Torsten Pook, Christopher Dörr and Alexander Freudenberg for hints and for comments.

## References

- [1] VanRaden, P.M.: Efficient methods to compute genomic predictions. *Journal of Dairy Science* **91**(11), 4414–4423 (2008)
- [2] Walsh, B., Lynch, M.: *Evolution and Selection of Quantitative Traits*. Oxford University Press, Oxford (2018)
- [3] Rampazo Amadeu, R., Cellon, C., Olmstead, J.W., Franco Garcia, A., Resende Jr, M.F.R.: AGHmatrix: R package to construct relationship matrices for autotetraploid and diploid species. *The Plant Genome* **9**(3), 1–10 (2016)
- [4] Soerensen, P., Rohde, P.D., Soerensen, I.F.: qgg: An R package for Quantitative Genetic and Genomic analyses. <http://psoerensen.github.io/qgg/> (2019)
- [5] Endelman, J.B.: Ridge regression and other kernels for genomic selection with R package rrBLUP. *Plant Genome* **4**, 250–255 (2011)
- [6] Granato, I., Fritsche-Neto, R.: snpReady: Preparing Genotypic Datasets in Order to Run Genomic Analysis. R package version 0.9.6. <https://cran.r-project.org/web/packages/snpReady/index.html> (2018)
- [7] Gogarten, S.M., Sofer, T., Chen, H., Yu, C., Brody, J.A., Thornton, T.A., Rice, K.M., Conomos, M.P.: Genetic association testing using the GENESIS R/Bioconductor package. *Bioinformatics* **35**, 5346–5348 (2019)
- [8] Yang, J., Lee, S.H., Goddard, M.E., Visscher, P.M.: GCTA: a tool for genome-wide complex trait analysis. *The American Journal of Human Genetics* **88**(1), 76–82 (2011)
- [9] Manichaikul, A., Mychaleckyj, J.C., Rich, S.S., Daly, K., Sale, M., Chen, W.-M.: Robust relationship inference in genome-wide association studies. *Bioinformatics* **26**, 2867–2873 (2010)
- [10] Chang, C.C., Chow, C.C., Tellier, L.C.A.M., Vattikuti, S., Purcell, S.M., Lee, J.J.: Second-generation PLINK: rising to the challenge of larger and richer datasets. *Gigascience* **4**(1), 7 (2015)
- [11] Schlather, M., Erbe, M., Skene, F., Freudenberg, A.: miraculix: Algebraic and Statistical Functions for Genetics. (2019). R package version 0.9.15. <https://github.com/schlather/miraculix>

- [12] R Core Team: R: A Language and Environment for Statistical Computing. R Foundation for Statistical Computing, Vienna, Austria (2019). R Foundation for Statistical Computing. <https://www.R-project.org/>
- [13] Ben-Haim, G.: Practical Intel(R) AVX Optimization on 2nd generation Intel(R) Core™ Processors. <https://software.intel.com/en-us/articles/practical-intel-avx-optimization-on-2nd-generation-intel-core-processors> (2012)
- [14] Purcell, S., Neale, B., Todd-Brown, K., Thomas, L., Ferreira, M.A.R., Bender, D., Maller, J., Sklar, P., de Bakker, P.I.W., Daly, M.J., Sham, P.C.: PLINK: a toolset for whole-genome association and population-based linkage analysis. *American Journal of Human Genetics* **81**(3), 559–575 (2007)
- [15] Dalke, A.: Simple benchmark harness for different popcount implementations. <http://dalkescientific.com/writings/diary/popcnt.cpp> (2011)
- [16] Dalke, A.: Update: Faster population counts. [http://www.dalkescientific.com/writings/diary/archive/2011/11/02/faster\\_popcount\\_update.html](http://www.dalkescientific.com/writings/diary/archive/2011/11/02/faster_popcount_update.html) (2011)
